# Supplementary material for: Fish Oil-Derived Fatty Acids in Pregnancy and Brain Metabolism in Middle Childhood: Results From a Randomized Controlled Trial
Source: Research Square preprint supplement (doi:10.21203/rs.3.rs-6678778/v1), 2025-05-23
Supplement: Supplementary file 1 [file a0fcf98c03ad20cbc03975bd.docx]

**Figure S1.** Illustration of the MRI techniques employed in the study. A) Magnetic resonance spectroscopy (MRS) was used to measure brain lactate concentrations in precuneus (orange square). B) Phase-contrast mapping MRI was used to acquire velocity-weighted images by positioning imaging planes perpendicular to the carotid arteries (red plane) and the basilar artery (blue plane), allowing calculation of global cerebral blood flow (CBF) as the total blood supply to the brain. Susceptibility-based oximetry (SBO) MRI was used to measure venous oxygen saturation in the blood exiting the brain via the sagittal sinus, enabling estimation of the global cerebral metabolic rate of oxygen (CMRO₂).
