# Supplementary material for: Fish Oil-Derived Fatty Acids in Pregnancy and Brain Metabolism in Middle Childhood: Results From a Randomized Controlled Trial
Source: Research Square preprint supplement (doi:10.21203/rs.3.rs-6678778/v1), 2025-05-23
Supplement: Supplementary file 2 [file a368666850d2e45b0bcc0bce.docx]

**Table S1**

| **Study** | **N** | **% Males** | **Mean age [range] in years** |
| --- | --- | --- | --- |
| Vestergaard et al. (2019) | 15 | 53.3 | 29.0 [20-40] |
| Vestergaard et al. (2022) | 27 | 74.1 | 24.4 [20-33] |
| Vestergaard et al. (2023) | 19 | 63.2 | 45.0 [24-64] |
| Vestergaard et al. (2022) | 184 | 100 | 65.1 [64-67] |
| COPSAC2010 | 460 | 51.7 | 10.3 [9.6-12.4] |

**Table S1**. Descriptive statistics pertaining to the participants belonging to different studies used for the age-validation analysis.
